# Supplementary material
Source: publisher figshare collection journal article supplement (https://tandf.figshare.com/ndownloader/files/22306392)
Supplement: Supplementary file 1 [file 22306392]

## Appendix

### A. Notes regarding the empirical analysis

The full samples of the 2015 and 2016 BSA included 4,328 and 2,942 respondents, respectively. These are representative samples of adults aged over 18 in the UK. In doing the analysis, the responses “don’t know” and “not answered” were removed. In the BSA 2015, the data relating to Scotland was removed, as the urban scales used for the Scottish cities were different to the rest. The final samples used in the analysis included 2,755 and 2,511 respondents (BSA 2015 and 2016, respectively). The data has been weighted before the analysis.

#### *Variables used*

Urbanity in BSA 2016: Categorical variable “How would you describe the place you live?” Choices: city; suburbs, town, country, farm

Urbanity in BSA 2015: Scale variable (urban/rural indicator covering England and Wales)

Social class: Scale variable (skills) (BSA 2015; BSA 2016)

Equivalised household income: Author’s calculations based on the household income and size

Table A1. BSA 2015 cluster analysis Round 1:

| Socio-spatial clusters                       | Description of the composing variables                                                                                      |
|----------------------------------------------|-----------------------------------------------------------------------------------------------------------------------------|
| The old urban poor                           | low income, old, urban minor conurbation/city or town that is less sparse, skilled occupations                              |
| The middle-aged upper class living in cities | high income, mid-aged, urban minor conurbation/city or town that is less sparse, managerial-technical to non-manual skilled |
| The urban skilled young on a very low income | low income, young, urban minor conurbation/city or town that is less sparse, skilled occupations                            |
| The rural dwellers on a low income           | Low income, rural town/village, non-manual skilled occupations                                                              |

Table A2. BSA 2015 cluster analysis Round 2 (low income only):

| Socio-spatial clusters                      | Description of the composing variables                                                                   |
|---------------------------------------------|----------------------------------------------------------------------------------------------------------|
| Non-working men living in a small city/town | mostly not working (56%), all male, mostly living in a small city/town (52%), all white                  |
| Working women living in a big city          | mostly living in a big city (almost half), mostly female (57%), mostly working (54%), mostly white (46%) |
| Working women living in a small city/town   | mostly living in a small city/town (55%), all female, all working, all white                             |
| Non-working women living in small city/town | mostly living in a small city/town (56%), all white, all female, all not working                         |
